# Supplementary material for: Health literacy in people with venous leg ulcers: a protocol for scoping review
Source: PubMed Central journal article supplement — BMJ Open. 2021 May 11;11(5):e044604. doi: 10.1136/bmjopen-2020-044604 (PMC8117997; doi:10.1136/bmjopen-2020-044604), 2021-05-11
Supplement: bmjopen-2020-044604supp001.pdf [file bmjopen-2020-044604supp001.pdf]

---

**Appendix 1: Search strings for MEDLINE via Ovid**


---

- 1 exp Leg Ulcer/
- 2 (venous leg ulcer\* or Venous ulcer\* or VLU or Venous insufficiency or Leg ulcer\* or Varicose ulcer\*).mp. [mp=title, abstract, original title, name of substance word, subject heading word, floating sub-heading word, keyword heading word, organism supplementary concept word, protocol supplementary concept word, rare disease supplementary concept word, unique identifier, synonyms]
- 3 1 or 2
- 4 Program Evaluation/
- 5 exp Nursing Research/
- 6 health education/ or consumer health information/ or health literacy/ or health promotion/ or healthy people programs/ or patient education as topic/ or teach-back communication/
- 7 health facilities/ or hospital units/ or hospitals/ or hospitals, community/ or hospitals, general/ or hospitals, high-volume/ or hospitals, low-volume/ or exp hospitals, private/ or exp hospitals, public/ or exp hospitals, rural/ or exp residential facilities/ or health services/ or exp community health services/ or health services for the aged/ or exp nursing care/ or exp nursing services/ or preventive health services/ or exp rural health services/
- 8 (Know\* adj2 (health or disease or illness)).mp. [mp=title, abstract, original title, name of substance word, subject heading word, floating sub-heading word, keyword heading word, organism supplementary concept word, protocol supplementary concept word, rare disease supplementary concept word, unique identifier, synonyms]
- 9 (Health adj2 (educat\* or literacy or interest or understanding)).mp. [mp=title, abstract, original title, name of substance word, subject heading word, floating sub-heading word, keyword heading word, organism supplementary concept word, protocol supplementary concept word, rare disease supplementary concept word, unique identifier, synonyms]
- 10 (Interest\* adj2 health interest).mp. [mp=title, abstract, original title, name of substance word, subject heading word, floating sub-heading word, keyword heading word, organism supplementary concept word, protocol supplementary concept word, rare disease supplementary concept word, unique identifier, synonyms]
- 11 (Information adj2 (dissemination or access or services or technology)).mp. [mp=title, abstract, original title, name of substance word, subject heading word, floating sub-heading word, keyword heading word, organism supplementary concept word, protocol supplementary concept word, rare disease supplementary concept word, unique identifier, synonyms]
- 12 (Teach\* adj materials).mp. [mp=title, abstract, original title, name of substance word, subject heading word, floating sub-heading word, keyword heading word, organism supplementary concept word, protocol supplementary concept word, rare disease supplementary concept word, unique identifier, synonyms]
- 13 (Health Literacy or Educat\* or Health promotion or Nurse-led education).mp. [mp=title, abstract, original title, name of substance word, subject heading word, floating sub-heading word, keyword heading word, organism supplementary concept word, protocol supplementary concept word, rare disease supplementary concept word, unique identifier, synonyms]

- 14 Recurrence/
- 15 4 or 5 or 6 or 7 or 8 or 9 or 10 or 11 or 12 or 13
- 16 attitude to health/ or health knowledge, attitudes, practice/ or "treatment adherence and compliance"/ or "patient acceptance of health care"/ or patient compliance/ or treatment refusal/
- 17 Recurrence/
- 18 treatment outcome/ or treatment failure/
- 19 Wound Healing/
- 20 Secondary Prevention/
- 21 Self Care/
- 22 Stockings, Compression/
- 23 (Adher\* adj2 (compression or self care or self management)).mp. [mp=title, abstract, original title, name of substance word, subject heading word, floating sub-heading word, keyword heading word, organism supplementary concept word, protocol supplementary concept word, rare disease supplementary concept word, unique identifier, synonyms]
- 24 (Concord\* adj2 (compression or self care or self management)).mp. [mp=title, abstract, original title, name of substance word, subject heading word, floating sub-heading word, keyword heading word, organism supplementary concept word, protocol supplementary concept word, rare disease supplementary concept word, unique identifier, synonyms]
- 25 (Compl\* adj2 (compression or self care or self management)).mp. [mp=title, abstract, original title, name of substance word, subject heading word, floating sub-heading word, keyword heading word, organism supplementary concept word, protocol supplementary concept word, rare disease supplementary concept word, unique identifier, synonyms]
- 26 (Adher\* or Concord\* or Compl\* or Impact or Effect or Outcome or Adher\* or Healing or Recur\* or Compress\* or self care or Self manag\* or health behavio?\*r\*).mp. [mp=title, abstract, original title, name of substance word, subject heading word, floating sub-heading word, keyword heading word, organism supplementary concept word, protocol supplementary concept word, rare disease supplementary concept word, unique identifier, synonyms]
- 27 16 or 17 or 18 or 19 or 20 or 21 or 22 or 23 or 24 or 25 or 26
- 28 3 and 15 and 27
